# Supplementary material
Source: publisher site journal article supplement (https://www.spandidos-publications.com/7720/downloadSupplementary)
Supplement: Supplementary file 1 [file downloadSupplementary]

Video S1. Coil embolization of an anterior communicating artery aneurysm using combined microcatheter and guidewire technique.
